# Supplementary material for: Effects of Dietary Glucose Oxidase Supplementation on the Performance, Apparent Ileal Amino Acids Digestibility, and Ileal Microbiota of Broiler Chickens
Source: MDPI journal article supplement (doi:10.3390/ani11102909), 2021-10-08
Supplement: s1 [file s1]

**Table S1.** Effect of dietary glucose oxidase addition on the carcass performance of broilers at 42 days of age

| Treatments <sup>1</sup> | Carcass<br>yield <sup>2</sup> (%) | Eviscerated carcass<br>yield <sup>2</sup> (%) | Thigh<br>yield <sup>3</sup> (%) | Breast<br>yield <sup>3</sup> (%) | Abdominal fat<br>weight <sup>3</sup> (%) |
|-------------------------|-----------------------------------|-----------------------------------------------|---------------------------------|----------------------------------|------------------------------------------|
| Control                 | 89.91                             | 72.37                                         | 28.76                           | 21.61                            | 1.41                                     |
| E250                    | 91.09                             | 74.33                                         | 27.50                           | 21.16                            | 1.34                                     |
| E500                    | 90.50                             | 72.63                                         | 29.32                           | 20.22                            | 1.48                                     |
| E1000                   | 90.67                             | 74.16                                         | 28.95                           | 21.66                            | 1.44                                     |
| SEM                     | 0.94                              | 1.30                                          | 0.80                            | 0.57                             | 0.11                                     |
| <i>p</i> -value         | 0.851                             | 0.482                                         | 0.374                           | 0.190                            | 0.846                                    |

<sup>1</sup> Control, E250, E500, and E1000 represented the basal diet supplemented with 0, 250, 500, and 1000 U glucose oxidase/kg diet, respectively.

<sup>2</sup> Calculated as a percentage of live bodyweight.

<sup>3</sup> Calculated as a percentage of eviscerated carcass weight.

**Table S2.** *p* values obtained from the comparison of microbiol unweighted UniFrac (gray background) or weighted UniFrac (white background) distance using the PERMANOVA tests.

| Treatments <sup>1</sup> | Control | E250  | E500  | E1000 |
|-------------------------|---------|-------|-------|-------|
| Control                 |         | 0.196 | 0.738 | 0.300 |
| E250                    | 0.049   |       | 0.033 | 0.164 |
| E500                    | 0.266   | 0.012 |       | 0.115 |
| E1000                   | 0.074   | 0.294 | 0.042 |       |

<sup>1</sup> Control, E250, E500, and E1000 represented the basal diet supplemented with 0, 250, 500, and 1000 U glucose oxidase/kg diet, respectively.

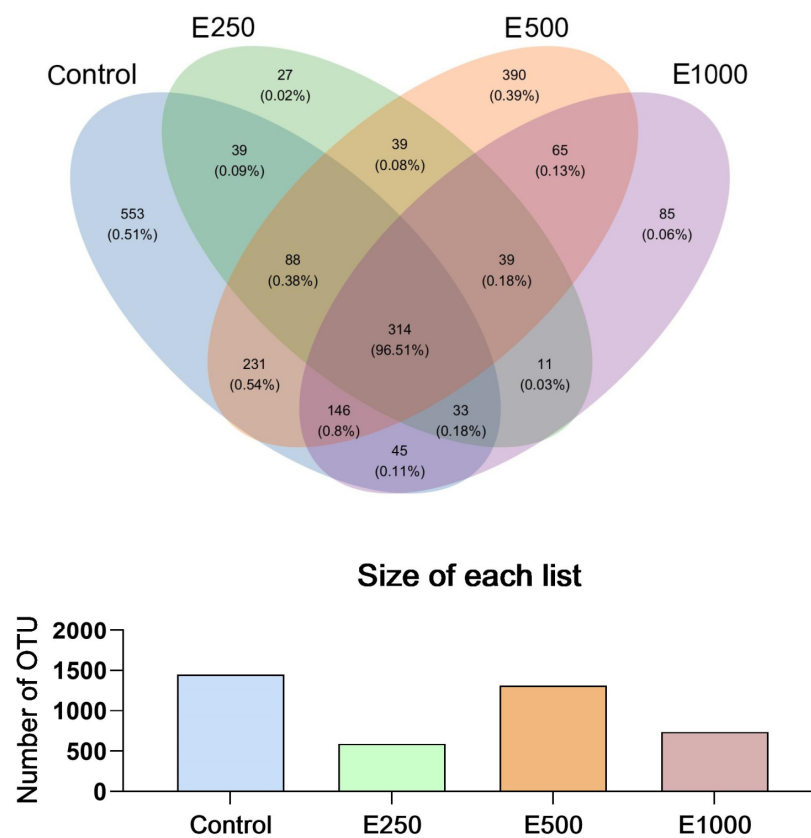

**Figure S1.** Effects of dietary glucose oxidase addition on the composition of bacterial OTUs in the ileal microbiota of broiler chickens. Venn diagram showing the occurrence of bacterial OTUs identified in 16S rRNA fragment sequencing of ileal microbiota of chickens fed a basal diet (Control) or the basal diet supplemented with 250 (E250), 500 (E500), or 1000 U glucose oxidase/kg diet.
